# Supplementary material
Source: publisher site journal article supplement (http://www.degruyter.com/publication/journal_key/GEO/downloadAsset/GEO_Article_Processing_Charges.pdf)
Supplement: Supplementary file 1 [file GEO_Article_Processing_Charges.pdf]

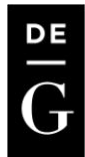

# OPEN GEOSCIENCES

EFFECTIVE JANUARY 2024

---

## ARTICLE PROCESSING CHARGES

In order to sustain the production of our fully-refereed open access journal, each article accepted for publication in *Open Geosciences* is subject to an Article Processing Charge of **€1500**. This fee is used to cover the costs of the peer-review process, professional typesetting and copyediting, as well as online hosting, long-term preservation, content aggregators worldwide, and extensive promotion to potential readers.

Editors and reviewers are not involved in author payment process and do not discuss charges with authors. The ability to pay does not influence whether or not a manuscript is accepted for publication.

Information regarding payment of these charges will be provided following acceptance for publication. There are no submission charges – Article Processing Charges apply after the acceptance of a manuscript. Inquiries concerning Article Processing Charges should be addressed before or immediately after submission of a paper to the Editorial Office.

## WAIVER POLICIES

If the submitting author is affiliated with an organization which is listed as an [Institutional Member](#), this membership offers a discount on the Article Processing Charge and the author has a reduced expense. Moreover, the authors who work for institutions in developing countries (countries classified by the World Bank as [low-income](#) and [lower-middle-income](#) economies) may apply for a waiver. Other authors who do not fulfill these criteria can also request a waiver or a discount during the submission process.

## FUNDING OPPORTUNITIES

Authors who are looking for funds to support the payment of Article Processing Charges have a number of options to consider. For details visit our [website](#).

## EDITORIAL OFFICE

Managing Editor  
Dr. Jan Barabach

De Gruyter Poland Ltd.  
Bogumiła Zuga 32A  
01-811 Warsaw / Poland  
Tel: +48 22 701 50 15

Email: [Jan.Barabach@degruyter.com](mailto:Jan.Barabach@degruyter.com)  
[www.opengeosciences.com](http://www.opengeosciences.com)
